# Supplementary material
Source: publisher figshare collection journal article supplement (https://plos.figshare.com/articles/dataset/_/1323308)
Supplement: Supplementary file [file 1]

**S1 Table: Genotyped SNPs and Hardy-Weinberg equilibrium test**

| SNP       | Position     | HWE test <i>P</i> value     |
|-----------|--------------|-----------------------------|
| rs4810424 | Promoter 2   | 0.1655                      |
| rs1884613 | Promoter 2   | 0.6920                      |
| rs1884614 | Promoter 2   | <b>no rare homozygote**</b> |
| rs6031543 | Promoter 2   | 0.9245                      |
| rs2144908 | Intron 1A-1D | 0.2945                      |
| rs6031550 | Intron 1A    | 0.6862                      |
| rs6031551 | Intron 1A    | 0.5303                      |
| rs6031552 | Intron 1A    | 1.0000                      |
| rs6130716 | Intron 1A    | 0.0720                      |
| rs6031558 | Intron 1A    | 0.1798                      |
| rs6130608 | Promoter 1   | 0.5189                      |
| rs2425637 | Promoter 1   | 0.4675                      |
| rs2425639 | Promoter 1   | 0.9232                      |
| rs3212172 | Promoter 1   | 1.0000                      |
| rs1800963 | Promoter 1   | 0.1923                      |
| rs2071197 | Promoter 1   | 0.8835                      |
| rs736824  | Intron 1     | 0.6889                      |
| rs745975  | Intron 1     | 0.7714                      |
| rs3212183 | Intron 2     | 0.1299                      |
| rs1885088 | Intron 3     | 0.2085                      |
| rs1800961 | Exon 4       | 1.0000                      |
| rs3212195 | Intron 4     | 0.8727                      |
| rs3212198 | Intron 4     | <b>0.0126*</b>              |
| rs3818247 | Intron 9     | <b>0.0032*</b>              |

HWE, Hardy-Weinberg equilibrium. \*SNPs with a significant HWE test were excluded for further analyses. \*\*SNP with no rare homozygote was excluded for association analyses.
