# Supplementary material
Source: publisher figshare collection journal article supplement (https://plos.figshare.com/articles/dataset/_/1323308)
Supplement: Supplementary file [file 1]

**S2 Table: Cut points used to define risk factors by age and sex**

| <b>Sex</b>   | <b>Age<br/>(y)</b> | <b>BMI<br/>(kg/m<sup>2</sup>)</b> | <b>Triglycerides<br/>(mmol/L)</b> | <b>HDL-C<br/>(mmol/L)</b> | <b>Systolic BP<br/>(mmHg)</b> | <b>Diastolic BP<br/>(mmHg)</b> | <b>Insulin<br/>(pmol/L)</b> |
|--------------|--------------------|-----------------------------------|-----------------------------------|---------------------------|-------------------------------|--------------------------------|-----------------------------|
| <b>Boys</b>  | <b>9</b>           | 20.04                             | 0.83                              | 1.22                      | 109                           | 60                             | 33.73                       |
|              | <b>13</b>          | 23.85                             | 1.01                              | 1.11                      | 121                           | 63                             | 56.16                       |
|              | <b>16</b>          | 26.45                             | 1.08                              | 1.00                      | 134                           | 66                             | 49.19                       |
| <b>Girls</b> | <b>9</b>           | 20.51                             | 0.96                              | 1.21                      | 108                           | 61                             | 39.03                       |
|              | <b>13</b>          | 26.01                             | 1.08                              | 1.13                      | 118                           | 65                             | 71.26                       |
|              | <b>16</b>          | 26.25                             | 1.23                              | 1.13                      | 121                           | 67                             | 61.09                       |

These cut points correspond to the 85<sup>th</sup> percentile of the study population for body mass index (BMI), the 75<sup>th</sup> percentile for triglycerides, insulin, systolic blood pressure (BP) and diastolic BP and the 25<sup>th</sup> percentile for HDL-cholesterol.
